# Supplementary material for: Potentially Probiotic Fermented Glutinous Rice (Oryza sativa L.) with Lactiplantibacillus plantarum Improved Immune System Response in a Small Sample of BALB/cByJ Mice
Source: MDPI journal article supplement (doi:10.3390/fermentation8110612), 2022-11-08
Supplement: s1 [file s1]

**Table S1.** The origins of the 53 isolates with its species name. The number on each coding represent the number of subculture in each universal bottles during the subculturing process of each isolates.

| Num. | Isolates Code                  | Origins                                                          |
|------|--------------------------------|------------------------------------------------------------------|
| 1    | FC3                            | Fish caudal (catfish suckermouth), <i>Hypostomus plecostomus</i> |
| 2    | CS7                            | Chia seeds, <i>Salvia hispanica</i> L                            |
| 3    | TA6                            | Tomatoes, <i>Solanum lycopersicum</i>                            |
| 4    | CL7                            | Chicken liver, <i>Gallus gallus domesticus</i>                   |
| 5    | AFL3                           | Asparagus, <i>Asparagus officinalis</i>                          |
| 6    | CI3                            | Chicken intestines, <i>Gallus gallus domesticus</i>              |
| 7    | TAUCU23                        | Taucu (Fermented Yellow Soybean), <i>Glycine max</i>             |
| 8    | PC2                            | Cabbage Pickle, <i>Brassica oleracea</i> var. <i>capitata</i>    |
| 9    | TA5                            | Fermented Turnip, <i>Brassica rapa</i> subsp. <i>rapa</i>        |
| 10   | TEMPEH5                        | Tempeh, <i>Glycine max</i>                                       |
| 11   | CS4                            | Chicken Skin, <i>Gallus gallus domesticus</i>                    |
| 12   | PC1                            | Cucumber Pickle, <i>Cucumis sativus</i>                          |
| 13   | TA8                            | Tauhu (bean curd) , <i>Glycine max</i>                           |
| 14   | PC4                            | Carrot Pickle, <i>Daucus carota</i>                              |
| 15   | AFV5                           | Fermented Fenugreek, <i>Trigonella foenum-graecum</i>            |
| 16   | AFSF2                          | Alfalfa Sprouts, <i>Medicago sativa</i>                          |
| 17   | PC6                            | Marinated Crab (Gejang), <i>Brachyura</i>                        |
| 18   | CL5                            | Chicken Liver, <i>Gallus gallus domesticus</i>                   |
| 19   | TAUCU7                         | Taucu, <i>Glycine max</i>                                        |
| 20   | CS9                            | Fish skin (catfish suckermouth), <i>Hypostomus plecostomus</i>   |
| 21   | CL4                            | Celery, <i>Apium graveolens</i>                                  |
| 22   | AFV9                           | Fermented Fenugreek, <i>Trigonella foenum-graecum</i>            |
| 23   | AFV1                           | Fermented Fenugreek, <i>Trigonella foenum-graecum</i>            |
| 24   | YJ2                            | Jalapeno Yoghurt, <i>Capsicum annuum</i> Jalapeno                |
| 25   | CI4                            | Fermented Lotus seeds, <i>Nelumbo nucifera</i>                   |
| 26   | CL6                            | Canned Lychee fruits, <i>Litchi chinesis</i>                     |
| 27   | KS1                            | Kidney Beans, <i>Phaseolus vulgaris</i>                          |
| 28   | <i>Lactobacillus fermentum</i> | <i>Lactobacillus fermentum</i> ATCC : 14931                      |
| 29   | CL1                            | Chicken Liver, <i>Gallus gallus domesticus</i>                   |
| 30   | TK3                            | Tempoyak, <i>Durio zibethinus</i> L.                             |
| 31   | TA18                           | Tauhu, <i>Glycine max</i>                                        |
| 32   | FS1                            | Fish Skin(catfish suckermouth), <i>Hypostomus plecostomus</i>    |
| 33   | HML1                           | Fermented Mayonnaise                                             |
| 34   | <i>Lactobacillus plantarum</i> | <i>Lactobacillus plantarum</i> ATC : 8014                        |
| 35   | TA9                            | Fermented sugarcane, <i>Saccharum officinarum</i>                |
| 36   | AFV4                           | Fermented Fenugreek, <i>Trigonella foenum-graecum</i>            |
| 37   | YJ5                            | Jalapeno Yoghurt, <i>Capsicum annuum</i> Jalapeno                |
| 38   | AFRZ                           | Fermented Ladies finger, <i>Abelmoschus esculentus</i>           |
| 39   | FC2                            | Fish caudal (catfish suckermouth), <i>Hypostomus plecostomus</i> |
| 40   | HML2                           | Fermented Mayonnaise                                             |
| 41   | FS3                            | Fish Skin (catfish suckermouth), <i>Hypostomus plecostomus</i>   |
| 42   | CS5                            | Coriander, <i>Coriandrum sativum</i>                             |
| 43   | AFV2                           | Fermented Fenugreek, <i>Trigonella foenum-graecum</i>            |
| 44   | CL3                            | Chicken Leg , <i>Gallus gallus domesticus</i>                    |
| 45   | HML3                           | Cow Milk's Yoghurt, <i>Bos taurus</i>                            |
| 46   | TEMPEH48                       | Tempeh, <i>Glycine max</i>                                       |
| 47   | TEMPEH37                       | Tempeh, <i>Glycine max</i>                                       |
| 48   | CL13                           | Chicken Leg, <i>Gallus gallus domesticus</i>                     |

|    |                            |                                                                  |
|----|----------------------------|------------------------------------------------------------------|
| 49 | RB5                        | Red Beans, <i>Vigna angularis</i>                                |
| 50 | <i>Lactobacillus casei</i> | <i>Lactobacillus casei</i> ATCC: 393                             |
| 51 | CL8                        | Chicken Limb , <i>Gallus gallus domesticus</i>                   |
| 52 | CI2                        | Chicken Intestines (Small), <i>Gallus gallus domesticus</i>      |
| 53 | FC1                        | Fish Caudal (catfish suckermouth), <i>Hypostomus plecostomus</i> |

**Table S2.** The survivability rate of 53 strains after 6 h of exposure at different parameters .

| Strains                           | Control     | Acid<br>(pH 4.0) | Temperature<br>(40°C) | Bile Salts (3%) | Enzyme (pepsin) | Overall SR (%) <sup>1</sup> |
|-----------------------------------|-------------|------------------|-----------------------|-----------------|-----------------|-----------------------------|
| CL3                               | 9.35 ± 0.01 | 8.35 ± 0.01      | 6.57 ± 0.02           | 7.12 ± 0.01     | 6.24 ± 0.05     | 67.64 <sup>a</sup>          |
| PC2                               | 8.34 ± 0.10 | 7.34 ± 0.10      | 6.38 ± 0.10           | 7.78 ± 0.03     | 6.03 ± 0.02     | 77.21 <sup>a</sup>          |
| TA8                               | 8.44 ± 0.01 | 7.44 ± 0.01      | 6.52 ± 0.05           | 7.00 ± 0.01     | 6.03 ± 0.01     | 66.14 <sup>ab</sup>         |
| PC4                               | 7.97 ± 0.10 | 7.07 ± 0.10      | 6.38 ± 0.01           | 7.13 ± 0.02     | 6.39 ± 0.04     | 89.62 <sup>b</sup>          |
| AFSF2                             | 8.78 ± 0.01 | 7.48 ± 0.01      | 6.59 ± 0.06           | 8.13 ± 0.10     | 6.13 ± 0.01     | 77.21 <sup>c</sup>          |
| <i>L.fermentum</i><br>ATCC :14931 | 8.99 ± 0.03 | 7.39 ± 0.03      | 6.37 ± 0.05           | 7.13 ± 0.03     | 6.06 ± 0.01     | 84.99 <sup>ab</sup>         |
| FS3                               | 9.20 ± 0.02 | 7.20 ± 0.02      | 6.26 ± 0.01           | 8.13 ± 0.07     | 6.21 ± 0.02     | 76.38 <sup>a</sup>          |
| RB5                               | 8.35± 0.15  | 8.35± 0.15       | 6.78± 0.00            | 7.04± 0.07      | 6.91±0.01       | 98.94 <sup>a</sup>          |
| CL8                               | 8.39± 0.02  | 8.49± 0.02       | 6.52±0.02             | 7.00 ± 0.02     | 6.23±0.06       | 88.74 <sup>b</sup>          |
| HML3                              | 7.07±0.08   | 8.07±0.08        | 6.24±0.04             | 7.41± 0.09      | 6.37±0.06       | 65.96 <sup>abc</sup>        |
| FC3                               | 2.33 ± 0.01 | 1.15 ± 0.01      | 4.54 ± 0.02           | 5.62 ± 0.01     | 3.23 ± 0.05     | 37.64 <sup>a</sup>          |
| CS7                               | 1.38 ± 0.10 | 1.14 ± 0.10      | 2.35 ± 0.10           | 0.48 ± 0.03     | 2.03 ± 0.02     | 13.21 <sup>a</sup>          |
| TA6                               | 1.33 ± 0.01 | 3.55 ± 0.01      | 2.53 ± 0.03           | 2.01 ± 0.01     | 1.02 ± 0.01     | 16.14 <sup>ab</sup>         |
| CL7                               | 2.37 ± 0.10 | 3.07 ± 0.10      | 2.34 ± 0.01           | 4.15 ± 0.02     | 5.28 ± 0.04     | 19.26 <sup>b</sup>          |
| AFL3                              | 0.78 ± 0.01 | 3.15 ± 0.01      | 1.31 ± 0.05           | 2.37 ± 0.10     | 4.23 ± 0.01     | 17.21 <sup>c</sup>          |
| CI3                               | 2.45 ± 0.05 | 2.37 ± 0.03      | 1.56 ± 0.03           | 0.23 ± 0.03     | 2.06 ± 0.01     | 14.99 <sup>ab</sup>         |
| TAUCU23                           | 1.12 ± 0.02 | 1.36 ± 0.02      | 2.15 ± 0.03           | 3.09 ± 0.07     | 1.21 ± 0.02     | 21.33 <sup>a</sup>          |
| TA5                               | 0.35± 0.15  | 1.72± 0.15       | 1.58± 0.01            | 1.29± 0.03      | 1.91±0.01       | 13.94 <sup>a</sup>          |
| TEMPEH5                           | 1.45± 0.02  | 1.27± 0.02       | 1.12±0.02             | 2.18 ± 0.02     | 1.23±0.07       | 13.84 <sup>b</sup>          |
| CS4                               | 1.04±0.03   | 2.19±0.03        | 1.13±0.04             | 1.11± 0.09      | 1.13±0.06       | 15.69 <sup>abc</sup>        |
| PC1                               | 1.37 ± 0.01 | 1.25 ± 0.01      | 1.33 ± 0.02           | 1.16 ± 0.01     | 1.45 ± 0.04     | 17.46 <sup>a</sup>          |
| AFV5                              | 0.97 ± 0.13 | 0.34 ± 0.03      | 1.15 ± 0.13           | 1.48 ± 0.03     | 1.33 ± 0.02     | 14.21 <sup>a</sup>          |
| PC6                               | 2.13 ± 0.01 | 1.35 ± 0.01      | 1.14 ± 0.03           | 1.21 ± 0.01     | 1.28 ± 0.01     | 15.14 <sup>ab</sup>         |
| CL5                               | 1.18 ± 0.10 | 3.57 ± 0.10      | 2.13 ± 0.01           | 2.05 ± 0.02     | 1.15 ± 0.03     | 13.26 <sup>b</sup>          |
| TAUCU7                            | 0.78 ± 0.01 | 3.15 ± 0.01      | 1.31 ± 0.05           | 2.37 ± 0.10     | 4.23 ± 0.01     | 17.21 <sup>c</sup>          |
| CS9                               | 2.15 ± 0.05 | 1.37 ± 0.03      | 1.36 ± 0.03           | 0.13 ± 0.03     | 1.46 ± 0.01     | 14.99 <sup>ab</sup>         |
| CL4                               | 1.12 ± 0.02 | 1.36 ± 0.02      | 2.15 ± 0.03           | 3.09 ± 0.07     | 1.21 ± 0.02     | 21.33 <sup>a</sup>          |
| AFV9                              | 0.35± 0.15  | 1.72± 0.15       | 1.58± 0.01            | 1.29± 0.03      | 1.91±0.01       | 13.94 <sup>a</sup>          |
| AFV1                              | 1.45± 0.02  | 1.27± 0.02       | 1.12±0.02             | 2.18 ± 0.02     | 1.23±0.07       | 13.51 <sup>b</sup>          |
| YJ2                               | 1.36±0.03   | 1.38±0.03        | 1.15±0.04             | 3.18± 0.09      | 2.15±0.06       | 18.69 <sup>abc</sup>        |
| CI4                               | 1.29 ± 0.01 | 2.37 ± 0.01      | 1.43 ± 0.02           | 0.93 ± 0.01     | 0.87 ± 0.04     | 17.46 <sup>a</sup>          |
| CL6                               | 0.87 ± 0.13 | 0.51 ± 0.01      | 0.51 ± 0.13           | 0.57 ± 0.03     | 0.29 ± 0.02     | 15.21 <sup>a</sup>          |
| KS1                               | 2.85 ± 0.01 | 5.65 ± 0.02      | 7.68 ± 0.03           | 4.03 ± 0.01     | 2.03 ± 0.01     | 36.41 <sup>ab</sup>         |

|                                |             |             |             |             |             |                      |
|--------------------------------|-------------|-------------|-------------|-------------|-------------|----------------------|
| CL1                            | 5.29 ± 0.10 | 3.29 ± 0.10 | 1.21 ± 0.01 | 3.09 ± 0.03 | 2.02 ± 0.03 | 29.26 <sup>b</sup>   |
| TK3                            | 0.31 ± 0.01 | 0.15 ± 0.01 | 0.24 ± 0.03 | 1.87 ± 0.10 | 1.83 ± 0.01 | 5.21 <sup>c</sup>    |
| TA18                           | 2.15 ± 0.05 | 3.73 ± 0.03 | 3.67 ± 0.03 | 6.45 ± 0.03 | 5.48 ± 0.01 | 38.99 <sup>ab</sup>  |
| FS1                            | 1.12 ± 0.02 | 5.36 ± 0.03 | 1.15 ± 0.01 | 5.09 ± 0.07 | 6.21 ± 0.02 | 37.33 <sup>a</sup>   |
| HML1                           | 7.35± 0.15  | 5.72± 0.15  | 4.78± 0.01  | 6.29± 0.03  | 2.91±0.01   | 61.94 <sup>a</sup>   |
| <i>Lactobacillus plantarum</i> | 4.45± 0.02  | 1.47± 0.02  | 7.12±0.02   | 5.18 ± 0.02 | 5.23±0.07   | 53.51 <sup>b</sup>   |
| TA9                            | 4.36±0.03   | 1.38±0.03   | 1.15±0.04   | 4.18± 0.09  | 5.15±0.06   | 48.69 <sup>abc</sup> |
| AFV4                           | 2.37 ± 0.10 | 3.07 ± 0.10 | 2.34 ± 0.01 | 4.15 ± 0.02 | 5.28 ± 0.04 | 19.26 <sup>b</sup>   |
| YJ5                            | 0.78 ± 0.01 | 3.15 ± 0.01 | 1.31 ± 0.05 | 2.37 ± 0.10 | 4.23 ± 0.01 | 17.21 <sup>c</sup>   |
| AFRZ                           | 2.45 ± 0.05 | 2.37 ± 0.03 | 1.56 ± 0.03 | 0.23 ± 0.03 | 2.06 ± 0.01 | 14.99 <sup>ab</sup>  |
| FC2                            | 1.12 ± 0.02 | 1.36 ± 0.02 | 2.15 ± 0.03 | 3.09 ± 0.07 | 1.21 ± 0.02 | 21.33 <sup>a</sup>   |
| HML2                           | 0.35± 0.15  | 1.72± 0.15  | 1.58± 0.01  | 1.29± 0.03  | 1.91±0.01   | 13.94 <sup>a</sup>   |
| CS5                            | 1.45± 0.02  | 1.27± 0.02  | 1.12±0.02   | 2.18 ± 0.02 | 1.23±0.07   | 13.84 <sup>b</sup>   |
| AFV2                           | 1.04±0.03   | 2.19±0.03   | 1.13±0.04   | 1.11± 0.09  | 1.13±0.06   | 15.69 <sup>abc</sup> |
| TEMPEH48                       | 1.37 ± 0.01 | 1.25 ± 0.01 | 1.33 ± 0.02 | 1.16 ± 0.01 | 1.45 ± 0.04 | 17.46 <sup>a</sup>   |
| TEMPEH37                       | 0.97 ± 0.13 | 0.34 ± 0.03 | 1.15 ± 0.13 | 1.48 ± 0.03 | 1.33 ± 0.02 | 14.21 <sup>a</sup>   |
| CL13                           | 2.13 ± 0.01 | 1.35 ± 0.01 | 1.14 ± 0.03 | 1.21 ± 0.01 | 1.28 ± 0.01 | 15.14 <sup>ab</sup>  |
| <i>Lactobacillus casei</i>     | 1.18 ± 0.10 | 3.17 ± 0.10 | 2.13 ± 0.01 | 2.05 ± 0.02 | 3.15 ± 0.03 | 13.26 <sup>b</sup>   |
| CI2                            | 4.37 ± 0.13 | 0.14 ± 0.03 | 1.45 ± 0.13 | 7.38 ± 0.03 | 6.33 ± 0.02 | 44.21 <sup>a</sup>   |
| FC1                            | 2.13 ± 0.01 | 1.35 ± 0.01 | 1.14 ± 0.03 | 2.21 ± 0.01 | 2.27 ± 0.01 | 15.14 <sup>ab</sup>  |

<sup>abc</sup> represent significant differences within the column ( $p < 0.05$ ).
